# Supplementary material for: Intrinsic Thermal Sensing Controls Proteolysis of Yersinia Virulence Regulator RovA
Source: PLOS journal article supplement (doi:10.1371/journal.ppat.1000435), 2009-05-14
Supplement: S6 (10.1371/journal.ppat.1000435.s006) [file journal.ppat.1000435.s006]

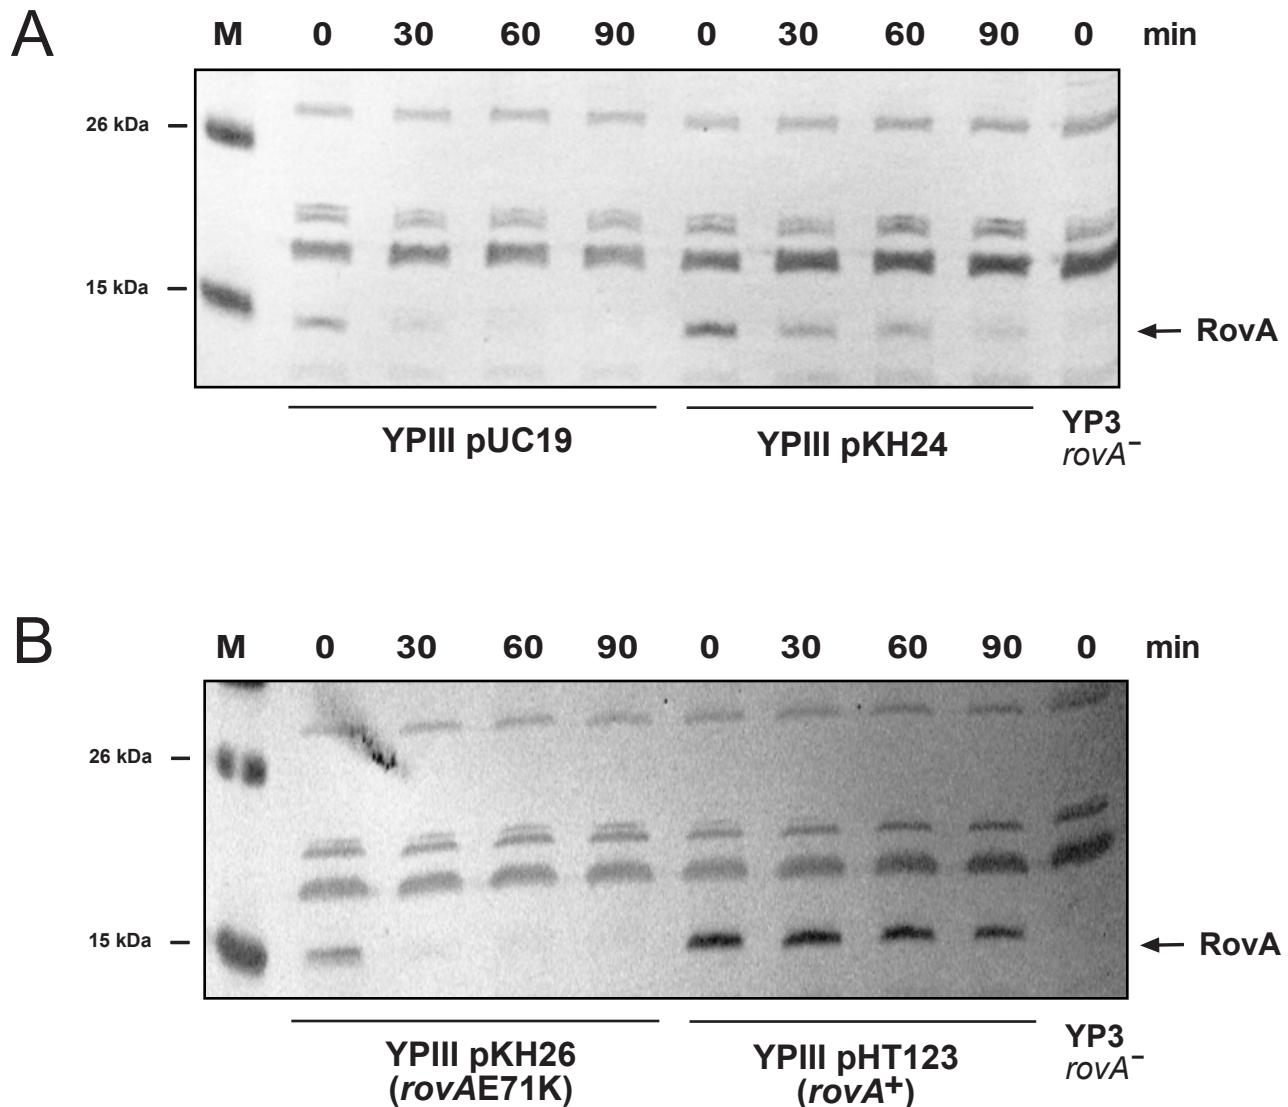

**Supplementary Fig. S6**

DNA-binding protects RovA proteolysis. **(A)** Stability of RovA during exponential phase at 37°C in *Y. pseudotuberculosis* YPIII pUC19 and YPIII pKH24, harbouring the RovA binding sites of the *rovA* promoter. **(B)** Stability of the RovA mutant protein RovAE71K and the RovA wildtype protein expressed by YPIII pKH26 and YPIII pHT123, respectively during the exponential phase at 37°C. Cultures of the *Y. pseudotuberculosis* strains were grown to exponential phase ( $OD_{600}$  = 0.3-0.4) at 25°C before chloramphenicol (200  $\mu$ g ml<sup>-1</sup>) was added to stop protein synthesis. The cultures were shifted to 37°C for additional 90 min. Aliquots of the cultures were removed at the indicated times, whole cell extracts from identical numbers of bacteria were prepared and analyzed by Western blotting with a polyclonal antibody directed against RovA. The *rovA* knock-out strain YP3 was used as a control. A prestained molecular weight marker is loaded on the left.
