# Supplementary material for: Intrinsic Thermal Sensing Controls Proteolysis of Yersinia Virulence Regulator RovA
Source: PLOS journal article supplement (doi:10.1371/journal.ppat.1000435), 2009-05-14
Supplement: S7 (10.1371/journal.ppat.1000435.s007) [file journal.ppat.1000435.s007]

PLOS Pathogens


Skip to main content

Advertisement

# PLOS Pathogens

- Browse 
  - Current Issue
  - Journal Archive
  - Collections
  - Pearls
  - Reviews
  - Opinions
  - Editorials
  - Find and Read Articles
- Publish

  - Submissions 
    - Getting Started
    - Submission Guidelines
    - Figures
    - Tables
    - Data Sharing Support
    - Supporting Information
    - LaTeX
    - Other Article Types
    - Preprints
    - Revising Your Manuscript
    - Submit Now
  - Policies 
    - Best Practices in Research Reporting
    - Human Subjects Research
    - Animal Research
    - Competing Interests
    - Disclosure of Funding Sources
    - Licenses and Copyright
    - Data Availability
    - Complementary Research
    - Materials, Software and Code Sharing
    - Ethical Publishing Practice
    - Authorship
    - Corrections, Expressions of Concern, and Retractions
  - Manuscript Review and Publication 
    - Editorial and Peer Review Process
    - Guidelines for Reviewers
    - Guidelines for Editors
    - Accepted Manuscripts
    - Comments

  ### Submit Your Manuscript

  *PLOS Pathogens* publishes Open Access research and commentary that significantly advance the understanding of
  pathogens and how they interact with host organisms.

  Get Started
- About 
  - Journal Information
  - Editors-in-Chief
  - Editorial Board
  - Publishing Information
  - Publication Fees
  - Press and Media
  - Contact
- Search
  Search


  advanced search


March 25, 2024

# Deubiquitinating activity of SARS-CoV-2 papain-like protease does not influence virus replication or innate immune responses *in vivo*

Image credit: ppat.1012100

### Calling all experts!

#### PLOS Pathogens welcomes talented individuals to join our editorial board.

Apply now

03/27/2024

Research Article

## The read-through transcription-mediated autoactivation circuit for virulence regulator expression drives robust type III secretion system 2 expression in *Vibrio parahaemolyticus*

Autoregulatory loop is essential for sustained vtrB activation and the consequent robust expression of T3SS2 genes for pathogenicity.

Image credit: ppat.1012094

### Recently Published Articles

- Modeling the emergence of viral resistance for SARS-CoV-2 during treatment with an anti-spike monoclonal antibody
- Small RNA SmsR1 modulates acidogenicity and cariogenic virulence by affecting protein acetylation in *Streptococcus mutans*
- Evidence for vagal sensory neural involvement in influenza pathogenesis and disease

See all articles

Current Issue March 2024

04/01/2024

Research Article

## Characterization and genomic analysis of the Lyme disease spirochete bacteriophage ϕBB-1

The ubiquitous ϕBB-1 phage and its implications in the generalized transduction of diverse genes and the maintenance of genetic diversity.

Image credit: ppat.1012122

04/01/2024

Research Article

## Broad-spectrum Delta-BA.2 tandem-fused heterodimer mRNA vaccine delivered by lipopolyplex

This vaccine has demonstrated its ability to induce broad-spectrum immunogenicity in mice and offers protection to both mice and monkeys when exposed to live SARS-CoV-2 challenges.

Image credit: ppat.1012116

02/28/2024

Research Article

## Structure and antigenicity of the divergent human astrovirus VA1 capsid spike

Insights into the maturation, assembly, and potential immune escape mutations of HAstV-VA1and potential differences in cell receptor usage.

Image credit: ppat.1012028

02/29/2024

Research Article

## Intoxication of antibiotic persisters by host RNS inactivates their efflux machinery during infection

Host reactive RNS both protect bacterial persisters against certain antibiotics and make them more susceptible to others during infection.

Image credit: ppat.1012033

02/26/2024

Research Article

## Species-specific emergence of H7 highly pathogenic avian influenza virus is driven by intrahost selection differences between chickens and ducks

HPAIVs are more likely to be selected at the intrahost level in poultry than in wild aquatic birds and point towards species-specific differences in HPAIV and LPAIV tropism and replication levels.

Image credit: ppat.1011942

02/15/2024

Research Article

## Enterovirus A71 does not meet the uncoating receptor SCARB2 at the cell surface

EV-A71 infection relies on two critical transmembrane protein receptors, PSGL-1 and SCARB2.

Image credit: ppat.1012022

02/20/2024

Research Article

## Cellular receptors for mammalian viruses

Dataset analysis uncovers common patterns of receptor usage among viruses.

Image credit: ppat.1012021

02/20/2024

Research Article

## Amino acid 138 in the HA of a H3N2 subtype influenza A virus increases affinity for the lower respiratory tract and alveolar macrophages in pigs

Analysis using the PAM cell line 3D4/21 revealed that the A138S substitution improved replication and apoptosis induction …

Image credit: ppat.1012026

PLOS Pathogens Microbiome Research: A Call for Papers

- ### Pathobiology and dysbiosis of the respiratory and intestinal microbiota in 14 months old Golden Syrian hamsters infected with SARS-CoV-2

  Brittany Seibert, C. Joaquín Cáceres, and colleagues
- ### Bile acids promote the caveolae-associated entry of swine acute diarrhea syndrome coronavirus in porcine intestinal enteroids

  Qi-Yue Yang, Yong-Le Yang, and colleagues
- ### Multi-omics analysis of the cervical epithelial integrity of women using depot medroxyprogesterone acetate

  Frideborg Bradley and colleagues
- ### Modulation of sensory perception by hydrogen peroxide enables *Caenorhabditis elegans* to find a niche that provides both food and protection from hydrogen peroxide

  Jodie A. Schiffer & Stephanie V. Stumbur and colleagues
- ### Evidence of MHC class I and II influencing viral and helminth infection via the microbiome in a non-human primate

  B. Karina Montero and colleagues

of

PLOS Pathogens Review articles

- ### Advances in understanding red blood cell modifications by *Babesia*

  Hakimi et al.
- ### After the virus has cleared—Can preclinical models be employed for Long COVID research?

  Jansen et al.
- ### Viral-mediated activation and inhibition of programmed cell death

  Verburg et al.
- ### Molecular architecture of bacterial type IV secretion systems

  Sheedlo et al.
- ### Bidirectional cytokine-microRNA control: A novel immunoregulatory framework in leishmaniasis

  Jafarzadeh et al.

of

### Publish with PLOS

- Submission Instructions
- Submit Your Manuscript

### Connect with Us

- Contact Us
- RSS
- PLOS Pathogens on Twitter
- PLOS on Facebook
- PLOS Blogs

Tweets by @plospathogens

## Get new content from PLOS Pathogens in your inbox

PLOS will use your email address to provide content from PLOS Pathogens.
You can find out more about how PLOS processes your data by reading our
Privacy Policy.
You can unsubscribe at any time by clicking the unsubscribe link in our emails or by contacting us at privacy@plos.org.

Sign up

## Thank you! You have successfully subscribed to the PLOS Pathogens newsletter.

## Sorry, an error occurred while sending your subscription. Please try again later.

Try again

PLOS Pathogens | ISSN: 1553-7374 (online)


- Publications
- PLOS Biology
- PLOS Climate
- PLOS Complex Systems
- PLOS Computational Biology
- PLOS Digital Health
- PLOS Genetics
- PLOS Global Public Health

- PLOS Medicine
- PLOS Mental Health
- PLOS Neglected Tropical Diseases
- PLOS ONE
- PLOS Pathogens
- PLOS Sustainability and Transformation
- PLOS Water

- Home
- Blogs
- Collections
- Give feedback
- LOCKSS

- Privacy Policy
- Terms of Use
- Advertise
- Media Inquiries
- Contact

PLOS is a nonprofit 501(c)(3) corporation, #C2354500, based in San Francisco, California, US
